# Supplementary material for: Red blood cell-derived phosphatidylserine positive extracellular vesicles are associated with past thrombotic events in patients with systemic erythematous lupus
Source: PubMed Central journal article supplement — Lupus Sci Med. 2022 Mar 8;9(1):e000605. doi: 10.1136/lupus-2021-000605 (PMC8905995; doi:10.1136/lupus-2021-000605), 2022-03-08
Supplement: lupus-2021-000605supp001.pdf [file lupus-2021-000605supp001.pdf]

**Supplemental Table 1:** Characteristics for prevalent (n=73) and incident (n=29) SLE patients included in the study at baseline.

|                                 | Prevalent                                | Incident           |
|---------------------------------|------------------------------------------|--------------------|
| <b>Demographics</b>             | <b>Mean <math>\pm</math> SD or n (%)</b> |                    |
| Age, years                      | 48.68 $\pm$ 13.42                        | 53.24 $\pm$ 16.97  |
| Gender, Female                  | 63 (86)                                  | 22 (76)            |
| BMI                             | 25.44 $\pm$ 4.82                         | 25.62 $\pm$ 4.32   |
| Disease duration, years         | 14.35 $\pm$ 12.08                        | 0.32 $\pm$ 0.31    |
| APS                             | 12 (16)                                  | 4 (15)             |
| <b>ACR criteria n=99</b>        | <b>n (%)</b>                             |                    |
| Arthritis                       | 56 (78)                                  | 23 (85)            |
| Thrombocytopenia                | 21 (29)                                  | 3 (11)             |
| Malar rash                      | 25 (35)                                  | 1 (4)              |
| Discoid rash                    | 15 (21)                                  | 3 (11)             |
| Hemolytic anemia                | 4 (6)                                    | 0 (0)              |
| Renal disorder                  | 23 (32)                                  | 2 (7)              |
| <b>Medication n=102</b>         | <b>n (%)</b>                             |                    |
| NSAID/ Cox-II Inhibitors        | 16 (22)                                  | 9 (31)             |
| Antimalarials                   | 58 (79)                                  | 19 (66)            |
| Immunomodulators                | 66 (92)                                  | 20 (74)            |
| Methotrexate                    | 13 (18)                                  | 3 (10)             |
| Biologic agents                 | 0 (0)                                    | 7 (10)             |
| Steroids                        | 16 (22)                                  | 6 (21)             |
| Other DMARD                     | 21 (29)                                  | 7 (24)             |
| Prednisone                      | 15 (21)                                  | 6 (21)             |
| <b>Clinical characteristics</b> | <b>Mean <math>\pm</math> SD or n (%)</b> |                    |
| SLEDAI                          | 2.75 $\pm$ 3.65                          | 3.93 $\pm$ 3.79    |
| Platelet, 10 <sup>9</sup> /L    | 224.57 $\pm$ 74.62                       | 233.72 $\pm$ 76.56 |
| MPV, fL                         | 8.95 $\pm$ 1.33                          | 8.83 $\pm$ 1.42    |
| Hemoglobin, g/L                 | 129.19 $\pm$ 13.43                       | 129.69 $\pm$ 9.06  |
| CRP, mg/L                       | 3.82 $\pm$ 5.30                          | 5.87 $\pm$ 10.29   |
| ESR, mm/hour                    | 10.42 $\pm$ 11.00                        | 20.93 $\pm$ 23.92  |
| Lupus anticoagulant             | 9 (14)                                   | 2 (8)              |
| Anti-cardiolipin IGG            | equivocal<br>abnormal                    | 2 (3)<br>4 (17)    |
| Anti-cardiolipin IGM            | equivocal<br>abnormal                    | 1 (2)<br>8 (13)    |
| anti- $\beta_2$ GPI IGG         | abnormal                                 | 6 (10)             |
| anti- $\beta_2$ GPI IGM         | abnormal                                 | 12 (19)            |
| <b>Cardiovascular damages</b>   | <b>Mean <math>\pm</math> SD or n (%)</b> |                    |
| History of thrombosis           |                                          |                    |
| Venous                          | 6 (8)                                    | 1 (3)              |
| Arterial                        | 1 (1)                                    | 3 (10)             |
| Microcirculation                | 1 (1)                                    | 0 (0)              |
| Plaque                          | 22/55 (47)                               | 9/17 (60)          |

---

|          |                  |                 |
|----------|------------------|-----------------|
| CIMT, mm | 0.59 ± 0.09 (30) | 0.75 ± 0.21 (5) |
|----------|------------------|-----------------|

---

ACR: American College of Rheumatology; APS: antiphospholipid syndrome;  $\beta_2$ GPI:  $\beta_2$  glycoprotein I; BMI: body mass index; CIMT: carotid intima-media thickness; CRP: C reactive protein; DMARD: Disease Modifying Anti Rheumatic Drug; ESR: erythrocyte sedimentation rate; MPV: mean platelet volume; NSAID: nonsteroidal anti-inflammatory drug; SLEDAI: SLE disease activity index.

**Supplemental Table 2:** Comparison of SLE patients with low (n=46) and high (n=40) PS<sup>+</sup> REVs after the exclusion of SLE patients with APS.

| <b>Demographic characteristics</b> |           | low                     | high                    | <i>P</i> <sub>value</sub> |
|------------------------------------|-----------|-------------------------|-------------------------|---------------------------|
| Gender                             | Female    | 41 (89)                 | 34 (85)                 | 0.7481                    |
| Age, years                         |           | 51.50 (41.00; 62.00)    | 49.50 (39.00; 59.00)    | 0.7073                    |
| Disease duration, years            |           | 8.53(0.76; 22.53)       | 3.58 (1.19; 16.00)      | 0.1556                    |
| Onset                              | Incident  | 15 (33)                 | 10 (25)                 | 0.4829                    |
|                                    | Prevalent | 31 (67)                 | 30 (75)                 |                           |
| APS                                |           | 0 (0)                   | 0 (0)                   |                           |
| <b>Clinical characteristics</b>    |           |                         |                         |                           |
| SLEDAI                             |           | 2.00 (0.00; 6.00)       | 1.50 (0.00; 4.00)       | 0.1421                    |
| Platelet, 10 <sup>9</sup> /L       |           | 237.00 (195.00; 293.00) | 213.50 (179.50; 251.50) | 0.1464                    |
| MPV, fL                            |           | 8.70 (7.80; 10.00)      | 8.80 (8.00; 9.50)       | 0.7821                    |
| Hemoglobin, g/L                    |           | 129.00 (122.00; 136.00) | 130.00 (122.00; 137.00) | 0.6992                    |
| CRP, mg/L                          |           | 2.90 (1.01; 3.42)       | 2.00 (1.00; 4.08)       | 0.9342                    |
| ESR, mm/hour                       |           | 8.00 (4.00; 20.00)      | 6.00 (3.00; 17.00)      | 0.3838                    |
| Lupus anticoagulant                | presence  | 1 (3)                   | 1 (3)                   | 1.0000                    |
| Anti-cardiolipin IGG               | abnormal  | 2 (6)                   | 7 (18)                  | 0.1613                    |
|                                    | equivocal | 1 (3)                   | 0 (0)                   |                           |
| Anti-cardiolipin IGM               | abnormal  | 2 (6)                   | 3 (8)                   | 0.8186                    |
|                                    | equivocal | 1 (3)                   | 0 (0)                   |                           |
| Anti-β <sub>2</sub> GP1 IGG        | abnormal  | 0 (0)                   | 3 (8)                   | 0.2431                    |
| Anti-β <sub>2</sub> GP1 IGM        | abnormal  | 3 (9)                   | 5 (8)                   | 0.7161                    |
| <b>Laboratory measurements</b>     |           |                         |                         |                           |
| ATX, ng/mL                         |           | 233.05 (194.30; 295.30) | 289.48 (209.88; 408.73) | <b>0.0281</b>             |
| PEVs, EVs/μL                       |           | 2442 (1089; 5044)       | 4919 (3067; 8517)       | <b>0.0009</b>             |
| PS+ PEVs, EVs/μL                   |           | 2130 (957; 4306)        | 4520 (2370; 7761)       | <b>0.0009</b>             |
| REVs, EVs/μL                       |           | 711 (422; 1333)         | 4269 (3192; 7040)       | <b>&lt;.0001</b>          |
| <b>ACR criteria</b>                |           |                         |                         |                           |
| Arthritis                          |           | 34 (76)                 | 33 (83)                 | 0.5958                    |
| Thrombocytopenia                   |           | 9 (20)                  | 11 (28)                 | 0.4521                    |
| Malar rash                         |           | 16 (36)                 | 7 (18)                  | 0.0869                    |
| Discoid rash                       |           | 10 (22)                 | 7 (18)                  | 0.7866                    |
| Hemolytic anemia                   |           | 3 (7)                   | 1 (3)                   | 0.6186                    |
| Renal disorder                     |           | 11 (24)                 | 10 (25)                 | 1.0000                    |
| <b>Cardiovascular damages</b>      |           |                         |                         |                           |
| History of thrombosis              |           | 0 (0)                   | 4 (10)                  | <b>0.0430</b>             |
| <b>Medication</b>                  |           |                         |                         |                           |
| NSAID/ Cox-II Inhibitors           |           | 13 (28)                 | 8 (20)                  | 0.4544                    |
| Prednisone                         |           | 7 (15)                  | 9 (23)                  | 0.4181                    |
| Immunomodulators                   |           | 38 (84)                 | 35 (88)                 | 0.7624                    |

Continuous variables are presented as median (Interquartile range),  $P_{value}$  based on Wilcoxon Mann Whitney Test. Categorical variables are presented as n (%),  $P_{value}$  based on Exact Pearson Chi Square Test.

**Supplemental Table 3:** Comparison of SLE patients with low (n=38) and high (n=64) PS<sup>+</sup> PEVs.

|                                    |           | PS <sup>+</sup> PEV     |                         |                           |
|------------------------------------|-----------|-------------------------|-------------------------|---------------------------|
| <b>Demographic characteristics</b> |           | Low                     | High                    | <i>P</i> <sub>value</sub> |
| Gender                             | Female    | 33 (87)                 | 52 (81)                 | 0.5868                    |
| Age, years                         |           | 52.00 (45.00; 62.00)    | 49.00 (39.00; 59.00)    | 0.2705                    |
| Disease duration, years            |           | 11.92 (3.39; 22.29)     | 3.80 (0.44; 15.65)      | <b>0.0183</b>             |
| Onset                              | Incident  | 10 (26)                 | 19 (30)                 | 0.8218                    |
|                                    | Prevalent | 28 (74)                 | 45 (70)                 |                           |
| APS                                |           | 8 (21)                  | 8 (13)                  | 0.2717                    |
| <b>Clinical characteristics</b>    |           |                         |                         |                           |
| SLEDAI                             |           | 2.00 (0.00; 4.00)       | 1.50 (0.00; 6.00)       | 0.4402                    |
| Platelet, 10 <sup>9</sup> /L       |           | 202.00 (179.00; 242.00) | 232.50 (184.50; 289.00) | <b>0.0408</b>             |
| MPV, fL                            |           | 8.80 (8.10; 10.30)      | 8.80 (8.00; 9.50)       | 0.3242                    |
| Hemoglobin, g/L                    |           | 129.00 (121.00; 138.00) | 131.00 (123.00; 137.00) | 0.3264                    |
| CRP, mg/L                          |           | 1.90 (1.00; 3.00)       | 2.90 (1.00; 6.00)       | 0.1467                    |
| ESR, mm/hour                       |           | 7.00 (2.00; 18.00)      | 7.00 (4.00; 17.00)      | 0.4916                    |
| Lupus anticoagulant                | presence  | 4 (13)                  | 7 (12)                  | 1.0000                    |
| Anti-cardiolipin IGG               | abnormal  | 2 (7)                   | 11 (19)                 | 0.0539                    |
|                                    | equivocal | 2 (7)                   | 0 (0)                   |                           |
| Anti-cardiolipine IGM              | abnormal  | 5 (18)                  | 7 (12)                  | 0.2258                    |
|                                    | equivocal | 1 (4)                   | 0 (0)                   |                           |
| Anti-β <sub>2</sub> GP1 IGG        | abnormal  | 3 (11)                  | 5 (8)                   | 1.0000                    |
| Anti-β <sub>2</sub> GP1 IGM        | abnormal  | 5 (18)                  | 12 (17)                 | 1.0000                    |
| <b>Laboratory measurements</b>     |           |                         |                         |                           |
| ATX, ng/mL                         |           | 222.50 (178.10; 265.75) | 283.95 (209.45; 364.85) | <b>0.0054</b>             |
| PEVs, EVs/μL                       |           | 1101 (546; 1987)        | 5415 (4151; 8329)       | <b>&lt;.0001</b>          |
| REVs, EVs/μL                       |           | 1098 (558; 1878)        | 3349 (1220; 6235)       | <b>0.0005</b>             |
| PS+ REVs, EVs/μL                   |           | 309 (68; 1179)          | 1534 (271; 2612)        | <b>0.0006</b>             |
| <b>ACR criteria</b>                |           |                         |                         |                           |
| Arthritis                          |           | 24 (69)                 | 55 (86)                 | 0.0648                    |
| Thrombocytopenia                   |           | 11 (69)                 | 13 (20)                 | 0.2303                    |
| Malar rash                         |           | 10 (29)                 | 16 (25)                 | 0.8119                    |
| Discoid rash                       |           | 8 (23)                  | 10 (16)                 | 0.4195                    |
| Hemolytic anemia                   |           | 2 (6)                   | 2 (3)                   | 0.6126                    |
| Renal disorder                     |           | 10 (29)                 | 15 (23)                 | 0.6319                    |
| <b>Cardiovascular damages</b>      |           |                         |                         |                           |
| History of thrombosis              |           | 7 (18)                  | 5 (8)                   | 0.1234                    |
| <b>Medication</b>                  |           |                         |                         |                           |
| NSAID/ Cox-II Inhibitors           |           | 12 (32)                 | 13 (20)                 | 0.2375                    |
| Prednisone                         |           | 6 (16)                  | 11 (23)                 | 0.4511                    |
| Immunomodulators                   |           | 33 (94)                 | 53 (83)                 | 0.1299                    |

Continuous variables are presented as median (Interquartile range),  $P_{value}$  based on Wilcoxon Mann Whitney Test. Categorical variables are presented as n (%),  $P_{value}$  based on Exact Pearson Chi Square Test.
